# Supplementary material for: Manipulation of prostate cancer metastasis by locus-specific modification of the CRMP4 promoter region using chimeric TALE DNA methyltransferase and demethylase
Source: PubMed Central journal article supplement (PMC4496338; doi:10.18632/oncotarget.3192), 2015-04-09
Supplement: oncotarget-06-10030-s001.pdf [file oncotarget-06-10030-s001.pdf]

## SUPPLEMENTARY METHODS

### Primers for CRMP4 promoter segments (F: forward primer)

CRMP4 A+ F: CCCTTGCAGCCTCTGAGAGCG  
AGTCACGG  
CRMP4 A- F: GCTTTCCATTTTCTAATGTGTA  
TGTTCCGGG  
CRMP4 B+ F: AGCAGAGGCGGCGCCAGCCC  
CRMP4 B- F: GAAGCCGGGAACCGTCTCCA  
TTCTG  
A common reverse primer: CCGAGCCGACCCCGC  
CCGCAG

### Primers for qRT-PCR (F: forward primer; R: reverse primer)

CRMP4 F: CGTCCACTTCTGCACTCTCT  
CRMP4 R: AAAGTTCTGGTGGAAATGGT  
Akt1 F: CTATGGCGCTGAGATTGTG  
Akt1 R: CTTAATGTGCCCGTCCTTGT  
Akt2 F: TGAAAACCTTCTGTGGGACC  
Akt2 R: TGGTCCTGGTTGTAGAAGGG  
Akt3 F: GGCGAGCTGTTTTTCCATTTG  
Akt3 R: GGCCATCTTTGTCCAGCATTG  
Rac1 F: CCCCCATTCTTGTTCAGATT  
Rac1 R: TGCTTTACGCATCTGAGAACTACAT  
18s rRNA F: CCTGGATACCGCAGCTAGGA  
18s rRNA R: GCGGCGCAATACGAATGCCCC

### Primers for ChIP (F: forward primer; R: reverse primer)

CRMP4 ChIP F1: ACGCGGGTGGAGGAGGGTGTG  
CRMP4 ChIP R1: CCCGAGATCAGGTGGAGTGA  
CRMP4 ChIP F2: GAATGGTTGAGTCCACTGCTA  
CRMP4 ChIP R2: CCCGGAACATACACATTAGA  
CRMP4 ChIP F3: GCTGCGCCGCTGTTTACC  
CRMP4 ChIP R3: TACCTTCCCGCCCTAGTTTCA  
CRMP4 ChIP F4: CAGTTCTACTCCAAATCCATG  
CRMP4 ChIP R4: CCCGGAACATACACATTAGAA  
CRMP4 ChIP F5: CTAATGTGTATGTTCCGGGTC  
CRMP4 ChIP R5: GTTTCAGAATGGAGACGGTTC  
GAPDH ChIP F: CTCCTACCAGAAGAATGGATCC  
GAPDH ChIP R: CTTTCATTCCATCCAGCCT  
GGG  
RASSF1A ChIP F: CCAAGTGTGTTGCTTCAGCA  
AAC  
RASSF1A ChIP R: CTTGCCCTTCCCTCCCTCC  
TTC  
p16 ChIP F: CTCCTGAAAATCAAGGGTTGAGG  
p16 ChIP R: CTTCTAACTGCCAAATGAATCG

### Primers for pyrosequencing

The sequence of 300 bp in both directions from the TALE-targeting sequence (-835/-813) was respectively amplified by PCR using the specific primers PCR-1 and PCR-2 for further pyrosequencing toward 5' of Region A and 3' of Region B using sequencing primers

PCR-1 forward: ATAGGGAATGGTTGAGTTTAT  
TGT  
PCR-1 reverse: Biotin-ACCCCCTCTCCTCTACCATA  
Sequencing primer 1: GTTTTTGTAGTTTTTGAGA  
(-873/-853)  
Sequencing primer 2: AGTTTTTTTTTAGAATAAAG  
(-704/-685)  
Sequencing primer 3: TTTAGGAGTTTGAAGGG  
(-766/-750)  
Sequencing primer 4: GTTTAGGGTTTGGGGA  
(-819/-804)  
Sequencing primer 5: GGGAATGGTTGAGTTTA  
(-899/-883)  
PCR-2 forward: AGGGTTTGGGGATTTTAGTAGGT  
PCR-2 reverse: Biotin-TCCCCAAAATAAAAACA  
TCAACT  
Sequencing primer 1: TAGAGTTATGGTAGAGGA  
GAG (-664/-644)  
Sequencing primer 2: GGGGAAGGTAGGAGAT  
(-594/-579)

### Primers for detecting hypermethylation CpG islands in regions A and B

A forward: AGGGAATGGTTGAGTTTATTGTTA  
A reverse: Biotin-ACACCCCCTCTCCTCTACCATA  
Sequencing primer A: GTTTTTGTAGTTTTTGAGA  
(-873/-853)  
B forward: ATATAGGGAATGGTTGAGTTTATTGT  
B reverse: Biotin-ACACCCCCTCTCCTCTACCATA  
Sequencing primer B: AGTTTTTTTTTAGAATAAAG  
(-704/-685)

### Primers for detecting alteration of methylation on p16, TWIST1 and RASSF1A promoter. (F: forward primer; R: reverse primer)

p16 F: GGAGGAAGAAAGAGGAGGGGT  
p16 R: Biotin-CAACCAATCAACCRAAAACTC  
TWIST1 F: GGGAGAGATGAGATATTATTATT  
GTGT  
TWIST1 R: Biotin-CTCCTCCCAAACCATTCAA  
RASSF1A F: TAGTGGGTAGGTTAAGTGTGTTGT  
RASSF1A R: Biotin-TACCCTTCCCTCCCTCCTC

### **Phospho explorer antibody microarray**

The phospho-antibody array was performed according to the manufacturer's protocol using Phospho Explorer Antibody Microarray (PEX100, Full Moon Biosystems). This antibody array contained 1318 well-characterized phospho-specific antibodies and also antibodies for phospho-specific antibodies and their non-phospho pairs to determine the relative level of phosphorylation. Each antibody is printed in duplicates.

Protein was extracted from PC3 cells transfected with and without CRMP4-TAL-Tet1c, respectively. The protein samples were used as subsequent biotin labeling and chip hybridization. Chip images were scanned using Axon GenePix 4000B, and the original data were acquired by GenePix software Pro 6. For data analysis, background signals were removed from all measurements. A ratio was calculated to measure the extent of protein phosphorylation. Results from quadruplicate samples were averaged.

SUPPLEMENTARY FIGURES AND TABLES

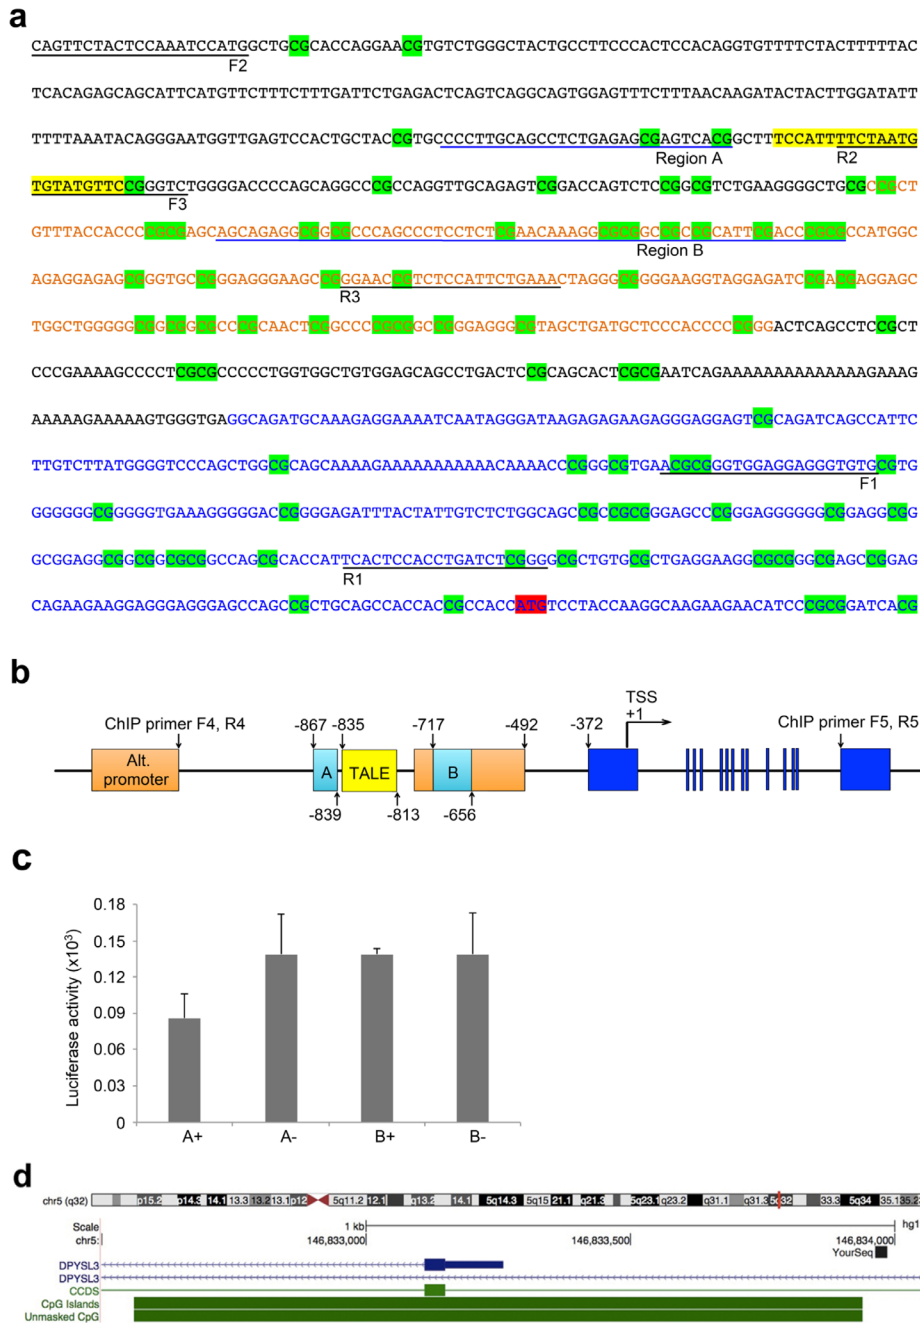

**Supplementary Figure S1: Human CRMP4 gene in chromosome 5. (a)** Promoter sequence of CRMP4 variant B (NM\_001387). The core promoter sequence in orange was predicted with a bioinformatic software Proscan (<http://www-bimas.cit.nih.gov/molbio/proscan/>). Primers used for ChIP assay are underlined in black and labeled underneath. Regions A and Region B are underlined in blue and labeled underneath. All CpG sites are highlighted in green. The initial exon is in blue. The selected TALE targeting sequence is highlighted in yellow. The start codon is highlighted in red. F1-5: forward primer 1-5; R1-5: reverse primer 1-5. **(b)** Schematic of CRMP4 gene structure. CRMP4 alternative promoter for variant A (NM\_001197294), the terminal exon, and their approximate ChIP detection sites are shown. The labeled sequence numbers are not on scale. The boxes shaded in orange: promoters, cyan: Regions A and B as labeled, yellow: the 23 nt TALE targeting sequence, blue: exons. **(c)** Luciferase activities of the four CRMP4 promoter reporters that were pre-treated with M.SssI. **(d)** Query of a 23 bp sequence selected as dTALE targeting modified against the human genome in Blast search. The *P* values in **c** were determined with the Student's *t*-test. The error bars in **c** are s.e.m.

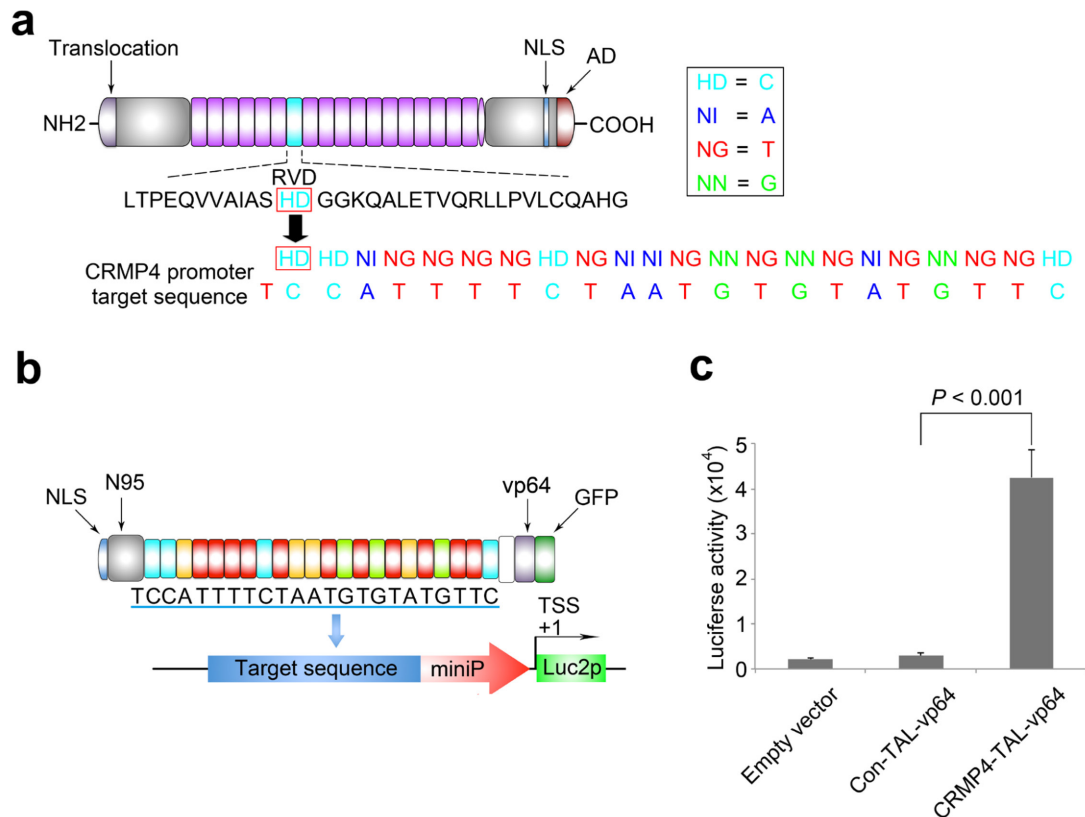

**Supplementary Figure S2: Recognition of dTALEs to its targeting sequence.** (a) Schematic of a wild-type TALE targeting the selected 23 nt CRMP4 promoter sequence. The N-terminal domain, middle tandem repeat domain, C-terminal linker, and other functional domains and motifs are shown. The modules recognizing different nucleotides are shown with corresponding colors (cyan for C, blue for A, red for T, and green for G). NLS: Nuclear Localization Signal; RVD: the Repeat Variable Di-residues; AD: transcription Activation Domain; a middle tandem repeat domain, and a C-terminal linker. (b) Composition of the CRMP4-Luc2p pGL4.27 reporter (lower panel) and CRMP4-TAL-VP64 (upper panel). (c) Luciferase activity induced by CRMP4-TAL-VP64 through targeted specific activation of the minimal promoter in the reporter. The  $P$  value in c is obtained using the Student's  $t$ -test. The error bars in c are s.e.m.

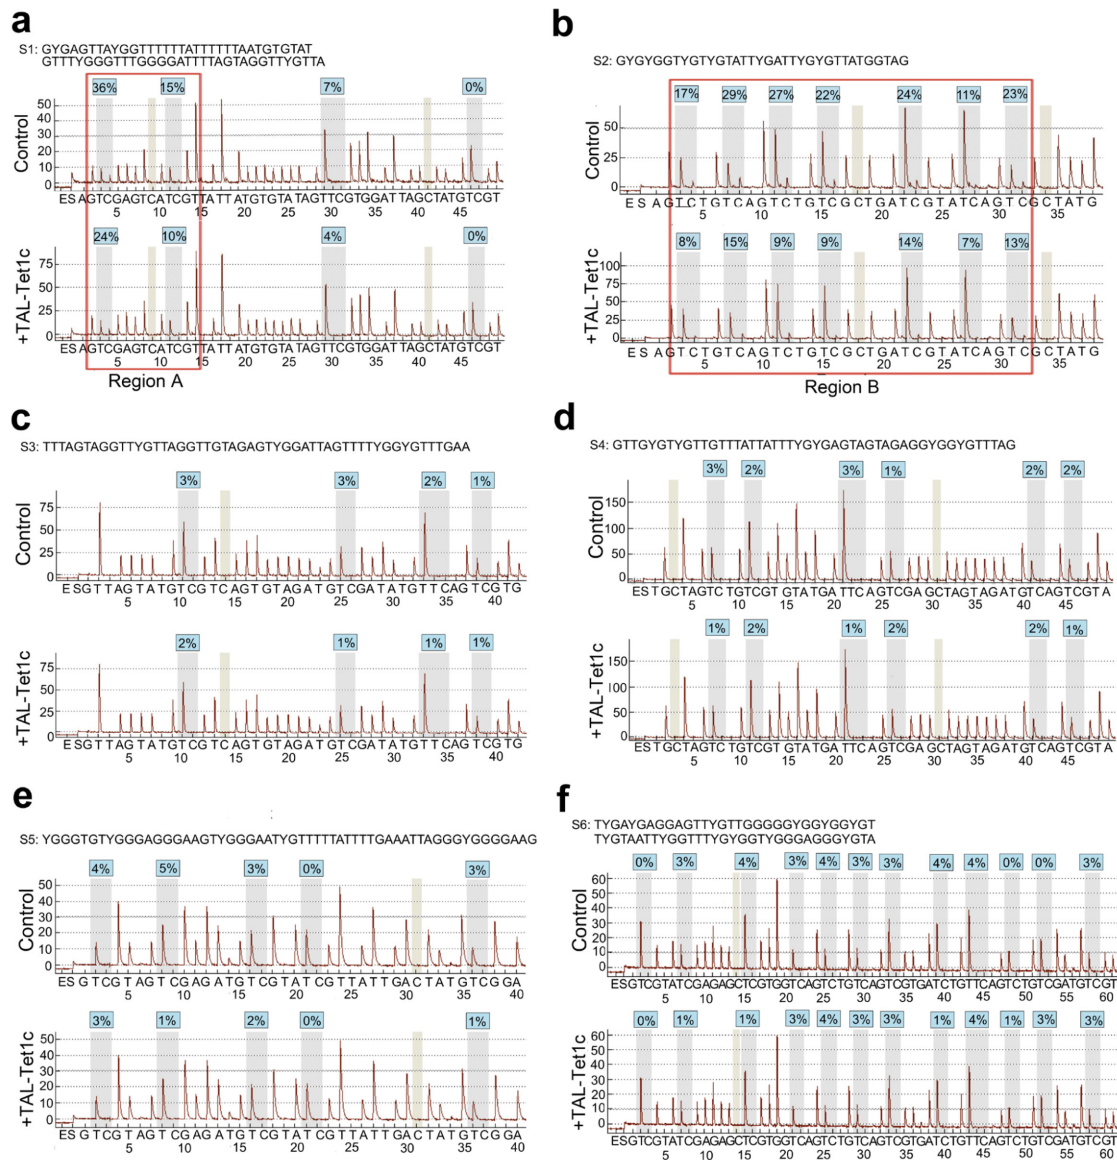

**Supplementary Figure S3: The potential area in the CRMP4 promoter likely affected by CRMP4-TAL-Tet1c.** Bisulfite treatment-coupled pyrosequencing analysis of Region A (**a**) and Region B (**b**) of genomic DNA isolated from the PC3 cells with and without transfection of CRMP4-TAL-Tet1c ( $P = 0.003$ ,  $P < 0.001$ , respectively). (**c-f**) Bisulfite treatment-coupled pyrosequencing analysis of the CRMP4 promoter region towards the 5' and 3' of the CRMP4-TAL-Tet1c targeting sequence. These sequences cover about 300 bp in both directions. The CpG demethylation was detected in various degrees following transfection of CRMP4-TAL-Tet1c. The  $P$  values in **a**, **b** are obtained using the Student's  $t$ -test.

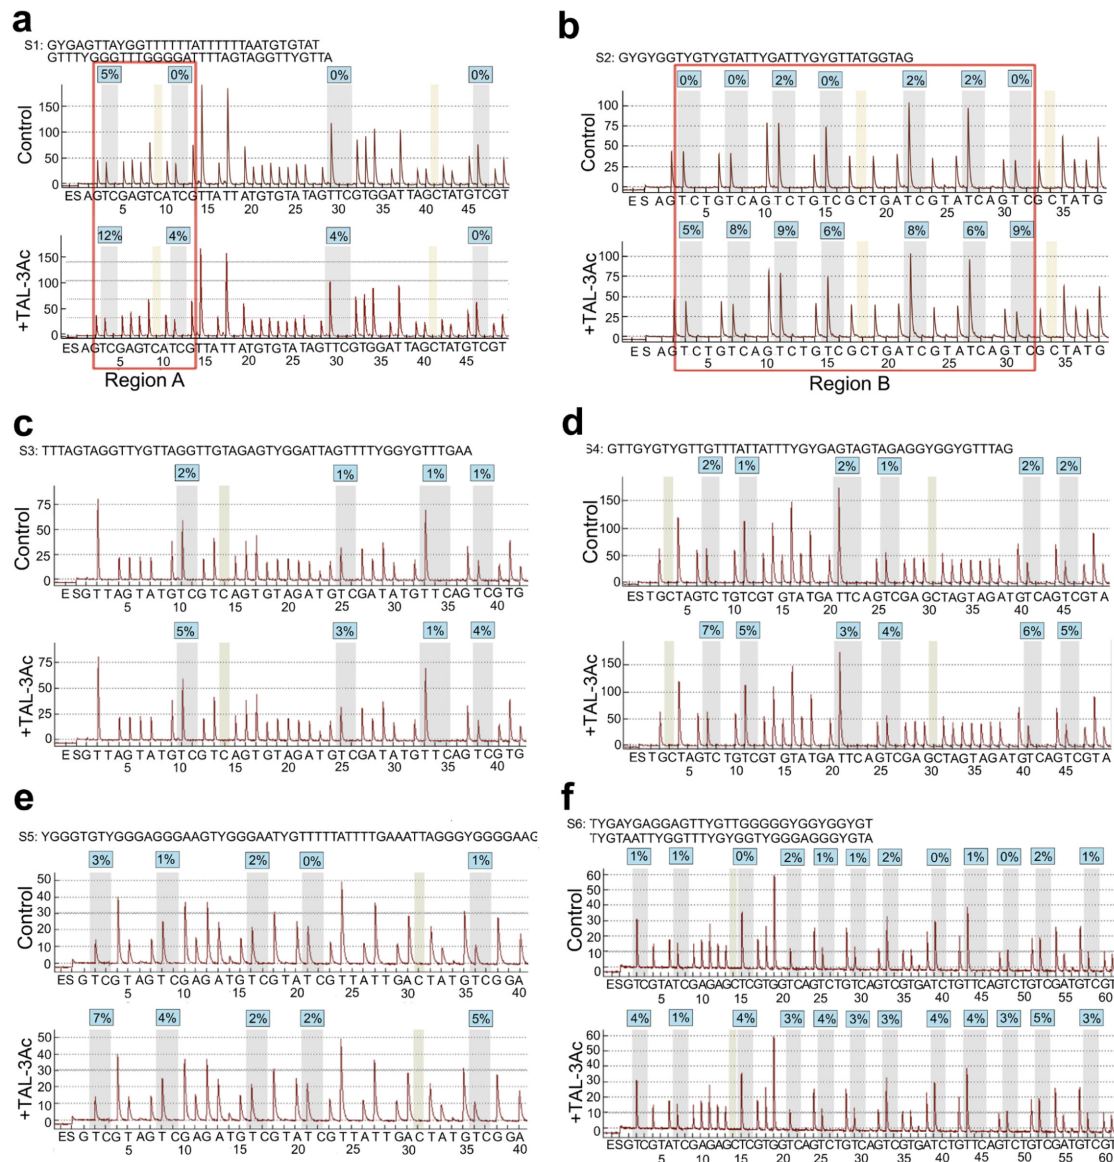

**Supplementary Figure S4: The potential area in the CRMP4 promoter likely affected by CRMP4-TAL-3Ac.** Bisulfite treatment-coupled pyrosequencing analysis of Region A (a) and Region B (b) of genomic DNA isolated from the 22Rv1 cells with and without transfection of CRMP4-TAL-3Ac ( $P = 0.01$ ,  $P < 0.01$ , respectively). (c-f) Bisulfite treatment-coupled pyrosequencing analysis of CRMP4 promoter region towards the 5' and 3' of the CRMP4-TAL-3Ac targeting sequence. These sequences cover about 300 bp in both directions. The CpG methylation was detected in various degrees following transfection of CRMP4-TAL-3Ac. The  $P$  values in a, b are obtained using the Student's  $t$ -test.

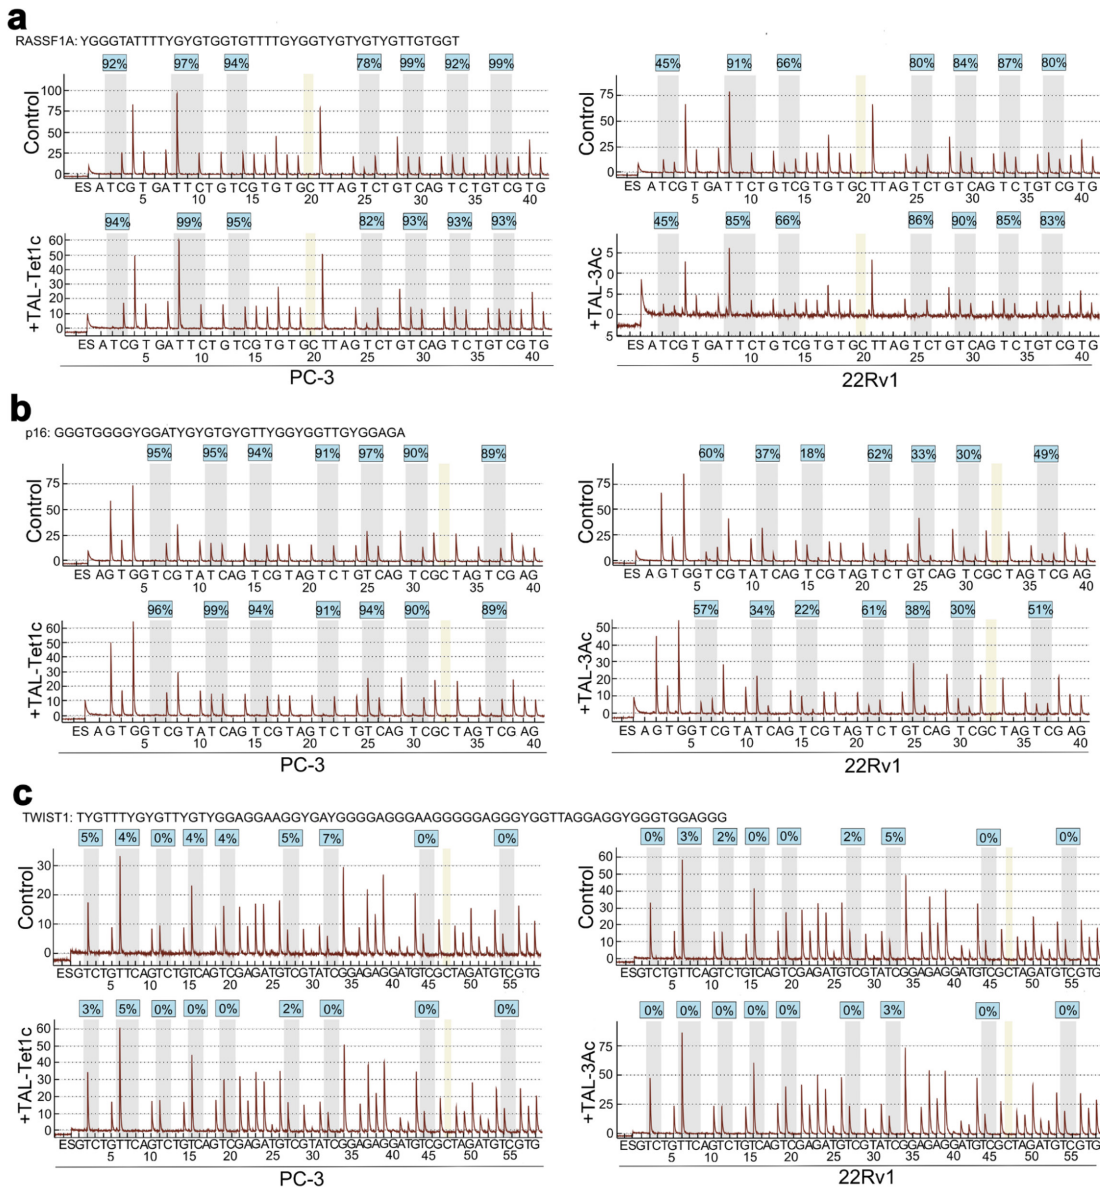

**Supplementary Figure S5: Off-target CpG modifications of the control gene promoters analyzed using bisulfite treatment-coupled pyrosequencing.** CpG modifications of (a) *RASSF1A* (NM\_007182), (b) *p16<sup>INK4A</sup>* (NM\_000077), and (c) *TWIST1* (NM\_000474) promoters in the PC3 cells (right column) and 22Rv1 cells (left column) transfected with CRMP4-TAL-Tet1c and CRMP4-TAL-3Ac, respectively. Their corresponding controls are presented. The *P* values in a–c obtained using the Student’s *t*-test are much greater than 0.05 and thus not significant.

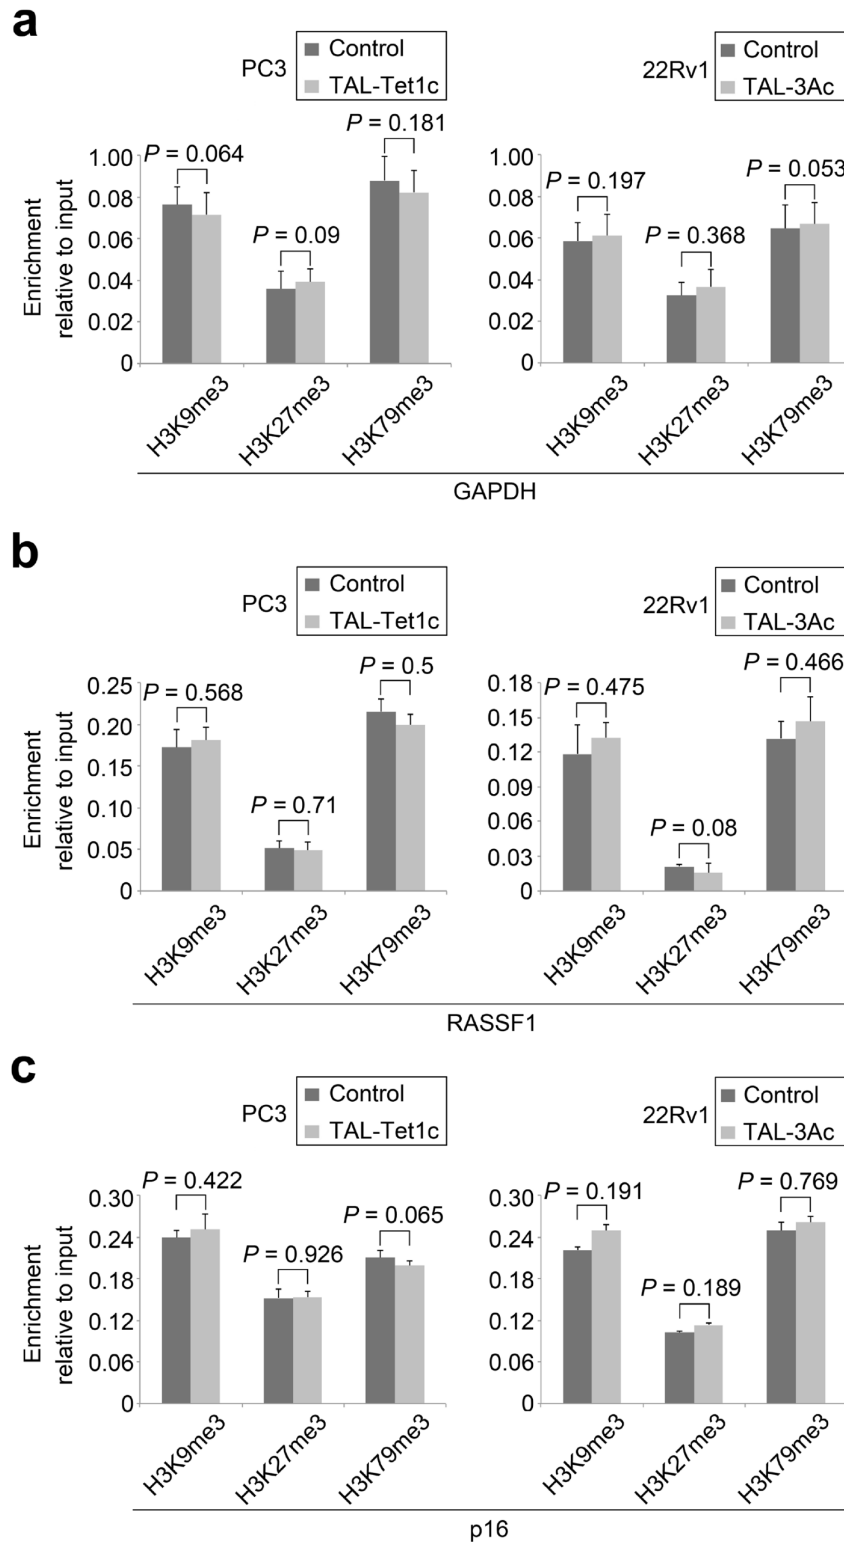

**Supplemental Figure S6: Off-target histone modifications of the control gene promoters analyzed using ChIP assay.** Ectopic expression of CRMP4-TAL-Tet1c in PC3 cells and CRMP4-TAL-3Ac in 22Rv1 cells induced the histone modifications at H3K9me3, H3K27me3 and H3K79me3 in (a) control gene *GAPDH* (NM\_002046), (b) control gene *RASSF1A* (NM\_007182), and (c) control gene *p16INK4a* (NM\_000077). Empty phCMV1 vector was transfected in PC3 and 22Rv1 cells as controls. Different from CRMP4 that is located in chromosome 5, the three control genes are located, respectively, in chromosome 12, 3, and 9. The *P* values in a–c obtained using Student's *t*-test are much greater than 0.05 and thus not significant.



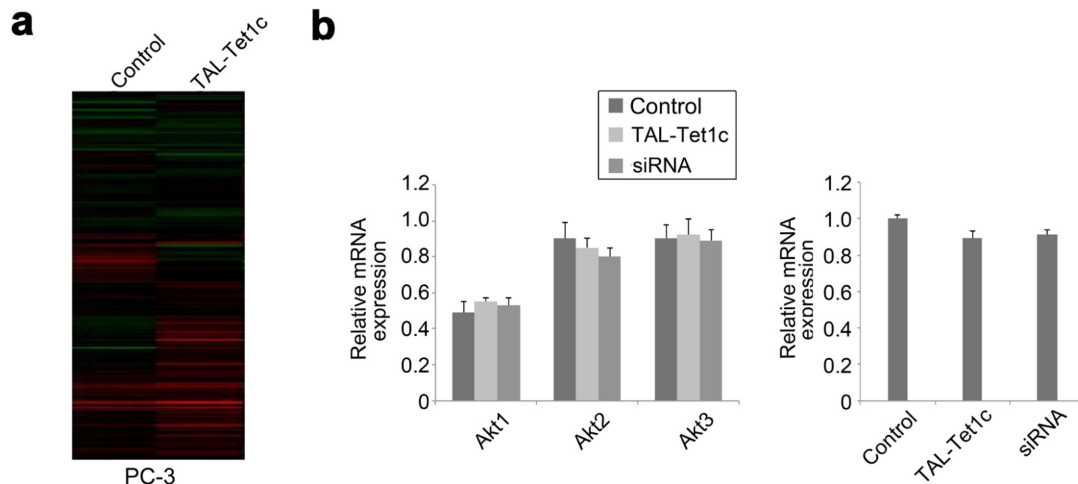

**Supplementary Figure S7: Phosphorylation status and specific gene expression induced by CRMP4-TAL-Tet1c.** (a) A heatmap reflecting protein phosphorylation alterations between the PC3 cells with and without transfection of CRMP4-TAL-Tet1c as detected by Phosphorylation Explorer Antibody Microarray. Akt (b, left panel) and Rac1 (b, right panel) mRNA levels in the PC3 cells with and without CRMP4-TAL-Tet1c expression were detected with no alterations using qRT-PCR analysis. The *P* values in b obtained using the Student's *t*-test are much greater than 0.05 and not significant.

**Supplementary Table S1: Alteration of protein phosphorylation by overexpressing CRMP4**

| Phosphorylation Sites                | Ratio | * Signaling pathways                                                    |
|--------------------------------------|-------|-------------------------------------------------------------------------|
| 4E-BP1 (Phospho-Ser65)               | 1.28  | AMPK, PMT, PIG                                                          |
| 4E-BP1 (Phospho-Ser65)               | 1.28  | AMPK                                                                    |
| 4E-BP1 (Phospho-Ser65)               | 1.28  | PMT                                                                     |
| 4E-BP1 (Phospho-Thr36)               | 1.90  | AKT, ChT, MAPK, AMPK, PMT, PIG                                          |
| 4E-BP1 (Phospho-Thr36)               | 1.90  | AMPK                                                                    |
| 4E-BP1 (Phospho-Thr36)               | 1.90  | PMT                                                                     |
| 4E-BP1 (Phospho-Thr36)               | 1.90  | PIG                                                                     |
| Abl1 (Phospho-Tyr204)                | 3.95  | CCC, PTG, PST, PER                                                      |
| ACC1 (Phospho-Ser79)                 | 2.27  | AMPK                                                                    |
| ACC1 (Phospho-Ser80)                 | 1.16  | AMPK                                                                    |
| ACTIN Pan (a/b/g) (Phospho-Tyr55/53) | 1.12  | CYT, PST                                                                |
| AKT (Phospho-Ser473)                 | 1.90  | AKT, PKB, MAPK, CYT, PAB, PAK, PER, PIG, PIR, PMT, PNK, PTC, PTG        |
| AKT1 (Phospho-Ser124)                | 1.32  | PKB, AMPK, CCC, PTG, PNK, PMT, PJS, PIR, PIG, PER                       |
| AKT1 (Phospho-Ser246)                | 1.25  | PKB, AMPK, CCC, PTG, PNK, PMT, PJS, PIR, PIG, PER                       |
| AKT1 (Phospho-Tyr474)                | 1.37  | PKB, AMPK, APO, CCC, CREB, PDGF, PTG, PST, PNK, PMT, PJS, PIR, PIG, PER |
| AKT1S1 (Phospho-Thr246)              | 1.53  | PKB, AMPK, PNK, PMT, PJS, PIR, PIG                                      |

(Continued)

| Phosphorylation Sites                   | Ratio | * Signaling pathways                |
|-----------------------------------------|-------|-------------------------------------|
| AMPK1 (Phospho-Thr174)                  | 1.30  | AMPK, PMT, PIG, MET                 |
| Androgen Receptor (Phospho-Ser213)      | 1.21  | NMR                                 |
| Androgen Receptor (Phospho-Ser650)      | 1.16  | NMR                                 |
| A-RAF (Phospho-Tyr301/302)              | 1.10  | APO, PST, PEK                       |
| Arrestin-1 (Phospho-Ser412)             | 1.11  | PDG, PEK                            |
| ASK1 (Phospho-Ser966)                   | 2.78  | AKT, MAPK                           |
| ASK1 (Phospho-Ser966)                   | 2.78  | APO                                 |
| ATF2 (Phospho-Ser112/94)                | 1.25  | PGF                                 |
| ATF4 (Phospho-Ser245)                   | 1.43  | ChT, MAPK                           |
| ATP-Citrate Lyase (Phospho-Ser454)      | 1.27  | PIG                                 |
| ATRIP (Phospho-Ser68/72)                | 1.51  | APO, CCC, PFT                       |
| BCL-XL (Phospho-Ser62)                  | 1.11  | AKT, APO, PJS                       |
| BCL-XL (Phospho-Thr47)                  | 1.42  | APO, PJS                            |
| BCR (Phospho-Tyr177)                    | 1.15  | PST                                 |
| B-RAF (Phospho-Ser446)                  | 2.78  | APO, PDG, PEK                       |
| B-RAF (Phospho-Thr598)                  | 1.25  | APO, PDG, PEK                       |
| BRCA1 (Phospho-Ser1423)                 | 1.60  | CCC, ChT, PFT                       |
| BRCA1 (Phospho-Ser1457)                 | 1.25  | CCC, PFT                            |
| BRCA1 (Phospho-Ser1524)                 | 1.54  | CCC, ChT, PFT                       |
| BTK (Phospho-Tyr222)                    | 1.20  | PST, PNK                            |
| Calmodulin (Phospho-Thr79/Ser81)        | 3.15  | CYT, PTC, PIR, PER                  |
| CaMK1-a (Phospho-Thr177)                | 1.21  | CYT, CREB, PIR, PER, PEK            |
| CaMK2-beta/gamma/delta (Phospho-Thr287) | 2.00  | AMPK, CYT, CREB, PIR, PDG, PER, PEK |
| CASP8 (Phospho-Ser347)                  | 1.25  | APO                                 |
| Caspase9 (Phospho-Ser196)               | 1.21  | APO, PVE, PIR                       |
| Caspase9 (Phospho-Tyr153)               | 1.45  | APO, PVE, PST, PIR                  |
| Catalase (Phospho-Tyr385)               | 1.57  | PST                                 |
| Cateninbeta (Phospho-Ser37)             | 1.84  | EGF, PER, WNT                       |
| Caveolin-1 (Phospho-Tyr14)              | 1.36  | CYT, EGF, PST, PIG, PER             |
| CD3Z (Phospho-Tyr142)                   | 1.38  | PTC, PST                            |
| CD4 (Phospho-Ser433)                    | 1.64  | PTC                                 |
| CDC25B (Phospho-Ser353)                 | 1.21  | CCC, PDG                            |
| CDC25C (Phospho-Ser216)                 | 1.85  | APO, CCC, CYT, PDG                  |
| CDK5 (Phospho-Tyr15)                    | 2.00  | PST                                 |
| Chk1 (Phospho-Ser345)                   | 1.12  | CCC, APO, PFT                       |
| Chk2 (Phospho-Thr383)                   | 2.31  | APO, CCC, PFT                       |

(Continued)

| Phosphorylation Sites                  | Ratio | * Signaling pathways                              |
|----------------------------------------|-------|---------------------------------------------------|
| Chk2 (Phospho-Thr387)                  | 1.12  | APO, CCC, PFT                                     |
| Chk2 (Phospho-Thr68)                   | 1.25  | CCC, APO, PFT                                     |
| c-Jun (Phospho-Ser73)                  | 1.62  | AKT, ChT, MAPK, PDGF, PTC                         |
| c-Jun (Phospho-Thr93)                  | 1.52  | AKT, ChT, MAPK, PDGF, PTC                         |
| CK2-b (Phospho-Ser209)                 | 1.16  | PNK                                               |
| c-met (Phospho-Tyr1003)                | 1.74  | PST                                               |
| Cofilin (Phospho-Ser3)                 | 1.22  | CYT, PTG                                          |
| Connexin43 (Phospho-Ser367)            | 1.28  | CYT                                               |
| Cortactin (Phospho-Tyr421)             | 1.42  | CYT, PST                                          |
| Cortactin (Phospho-Tyr466)             | 1.69  | CYT, PST                                          |
| c-Raf (Phospho-Ser43)                  | 1.40  | CYT, CREB, EGF, MET, PJS, PIR, PIG, PDG, PFT, PEK |
| CREB (Phospho-Ser121)                  | 1.13  | CREB, PIR, PGF, PEK                               |
| CREB (Phospho-Ser133)                  | 1.32  | APO, ChT, MAPK, CREB, PIR, PGF, PEK               |
| CREB (Phospho-Ser142)                  | 1.20  | CREB, PIR, PGF, PEK                               |
| CyclinB1 (phospho-Ser126)              | 2.56  | AMPK, CCC                                         |
| CyclinD1 (Phospho-Thr286)              | 2.68  | PKB, CCC, PFT                                     |
| CyclinD3 (Phospho-Thr283)              | 1.21  | CCC, PFT                                          |
| CyclinE1 (Phospho-Thr395)              | 1.12  | CCC, PFT                                          |
| DAXX (Phospho-Ser668)                  | 1.72  | APO                                               |
| DDX5/DEAD-boxprotein5 (Phospho-Tyr593) | 1.55  | PST                                               |
| DNA-PK (Phospho-Thr2638)               | 1.36  | CCC, PFT                                          |
| Dok-2 (Phospho-Tyr299)                 | 1.74  | EGF, PER                                          |
| DYN1 (Phospho-Ser774)                  | 1.87  | PDG, PEK                                          |
| E2F1 (Phospho-Thr433)                  | 1.31  | CCC, PFT                                          |
| EEF2 (Phospho-Thr56)                   | 1.19  | AMPK                                              |
| eEF2K (Phospho-Ser366)                 | 1.49  | AMPK                                              |
| EGFR (Phospho-Tyr1016)                 | 1.15  | EGF, PST, PJS                                     |
| EGFR (Phospho-Tyr1016)                 | 1.15  | PER                                               |
| EPHA2/3/4 (Phospho-Tyr588/596)         | 1.30  | PST                                               |
| FADD (Phospho-Ser194)                  | 1.24  | APO                                               |
| Filamin A (Phospho-Ser2152)            | 1.31  | CYT                                               |
| FosB (Phospho-Ser27)                   | 1.47  | CREB, PDGF, PTC, PEK                              |
| FOXO1A (Phospho-Ser329)                | 1.76  | PKB, APO, MET, CCC, PIG, PER                      |
| Gab1 (Phospho-Tyr627)                  | 1.53  | AKT, PKB, EGF, PST, PIG, PGF, PER                 |
| GAB1 (Phospho-Tyr659)                  | 1.37  | PKB, EGF, PST, PIG, PGF, PER                      |

(Continued)

| Phosphorylation Sites                                            | Ratio | * Signaling pathways                    |
|------------------------------------------------------------------|-------|-----------------------------------------|
| GABA-RB (Phospho-Ser434)                                         | 1.20  | PKB, PGF                                |
| GAP43 (Phospho-Ser41)                                            | 1.16  | PDGF                                    |
| GRB10/Growth factor receptor-bound protein 10 (Phospho-Tyr67)    | 1.32  | PST, PIG                                |
| GRK2 (Phospho-Ser29)                                             | 1.90  | PDG                                     |
| HCK (Phospho-Tyr410)                                             | 1.16  | PST                                     |
| HDAC1 (Phospho-Ser421)                                           | 1.15  | CCC, PNK, PFT, WNT                      |
| HDAC3 (Phospho-Ser424)                                           | 1.60  | CCC, PNK, PFT, WNT                      |
| HDAC4 (Phospho-Ser632)                                           | 1.12  | CCC, ChT, PNK, PFT, WNT                 |
| HDAC5 (Phospho-Ser259)                                           | 1.56  | CCC, PNK, PFT, WNT                      |
| HDAC5 (Phospho-Ser498)                                           | 1.12  | CCC, ChT, PNK, PFT, WNT                 |
| HDAC6 (Phospho-Ser22)                                            | 1.27  | CCC, PNK, PFT, WNT                      |
| HER2 (Phospho-Tyr1221/Tyr1222)                                   | 3.05  | EGF, PER                                |
| HER2 (Phospho-Tyr877)                                            | 1.84  | NMR, EGF, PST, PER                      |
| HER3/ErbB3 (Phospho-Tyr1289)                                     | 1.26  | PST, PER                                |
| HRS (Phospho-Tyr334)                                             | 1.32  | PST                                     |
| HSL (Phospho-Ser552/563)                                         | 1.69  | AMPK, PIG                               |
| HSL (Phospho-Ser554)                                             | 1.26  | AMPK, PIG                               |
| HSP27 (Phospho-Ser82)                                            | 2.13  | APO, MAPK, APO, PVE                     |
| I $\kappa$ B-beta (Phospho-Thr19)                                | 2.79  | APO, PDGF, PTC, PNK                     |
| IKK-gamma (Phospho-Ser31)                                        | 1.50  | APO, EGF, PIR                           |
| IKK-gamma (Phospho-Ser85)                                        | 3.57  | APO, PDGF, EGF, PTC, PNK, PIG           |
| Integrinbeta-1 (phospho-Thr788)                                  | 1.31  | PDG                                     |
| Interferon-gamma receptor alpha chain precursor (Phospho-Tyr457) | 1.21  | PST, PJS                                |
| IR (Phospho-Tyr1361)                                             | 1.15  | PST, PMT, PIG                           |
| IRS-1 (Phospho-Ser312)                                           | 1.42  | AKT, APO, MAPK, PKB, PIR, PIG           |
| IRS-1 (Phospho-Ser323)                                           | 2.28  | PKB, PIR, PIG                           |
| IRS-1 (Phospho-Ser639)                                           | 2.54  | AKT, APO, MAPK, PKB, PIR, PIG           |
| JAK1 (Phospho-Tyr1022)                                           | 1.16  | AKT, APO, PKB, PDGF, EGF, PST, PJS, PER |
| JunB (Phospho-Ser79)                                             | 1.14  | ChT, MAPK                               |
| LaminA/B (laminA/C) (Phospho-Ser392)                             | 1.45  | APO                                     |
| LAT (Phospho-Tyr171)                                             | 1.31  | PTC, PST                                |
| LAT (Phospho-Tyr191)                                             | 1.89  | PTC, PST                                |
| LCK (Phospho-Ser59)                                              | 1.11  | PTC, PNK                                |
| Lck (Phospho-Tyr393)                                             | 1.51  | PTC, PST, PNK                           |
| LIMK1 (Phospho-Thr508)                                           | 1.20  | CYT, PTG                                |

(Continued)

| Phosphorylation Sites          | Ratio | * Signaling pathways                                                         |
|--------------------------------|-------|------------------------------------------------------------------------------|
| LKB1 (Phospho-Ser428)          | 1.21  | AMPK, PIG                                                                    |
| LYN (Phospho-Tyr507)           | 1.71  | PKB, PST                                                                     |
| MAPK APK2 (Phospho-Thr334)     | 2.47  | PVE, PDG, PGF, PFT                                                           |
| MDM2 (Phospho-Ser166)          | 1.57  | PKB, CCC, PFT, PER                                                           |
| MEF2A (Phospho-Thr312)         | 1.13  | ChT, MAPK, AMPK, PIR, PER                                                    |
| MEF2A (Phospho-Thr319)         | 1.91  | ChT, MAPK, AMPK, PIR, PER                                                    |
| MEK1 (Phospho-Ser217)          | 1.11  | CYT, MAPK, CYT, MET, CREB, PDGF, EGF, PVE, PTC, PJS, PIG, PDG, PGF, PFT, PEK |
| MEK1 (Phospho-Ser298)          | 2.29  | CYT, CREB, PDGF, MET, EGF, PVE, PTC, PJS, PIG, PDG, PGF, PFT, PEK            |
| MEK1 (Phospho-Thr286)          | 1.12  | CYT, CREB, PDGF, EGF, MET, PVE, PTC, PJS, PIG, PDG, PGF, PFT, PEK            |
| Merlin (Phospho-Ser10)         | 2.41  | CYT                                                                          |
| Merlin (Phospho-Ser518)        | 1.27  | CYT                                                                          |
| Met (Phospho-Tyr1349)          | 1.73  | AKT, MAPK, PST                                                               |
| MKK3 (Phospho-Ser189)          | 1.13  | EGF, PVE                                                                     |
| MKK6 (Phospho-Ser207)          | 1.35  | EGF, PVE, PTG, PTC                                                           |
| MKP-1 (Phospho-Ser359)         | 1.18  | PDG                                                                          |
| MKP-1/2 (Phospho-Ser296)       | 1.14  | PDG                                                                          |
| Mnk1 (Phospho-Thr385)          | 1.19  | PMT, PEK                                                                     |
| MSK1 (Phospho-Ser360)          | 1.30  | PNK, PDG, PEK                                                                |
| mTOR (Phospho-Ser2448)         | 1.16  | PKB, AMPK, MET, PTG, PMT, PJS, PIR, PIG, PER                                 |
| mTOR (Phospho-Ser2481)         | 1.36  | PKB, AMPK, MET, PTG, PMT, PJS, PIR, PIG, PER                                 |
| Myc (Phospho-Ser373)           | 1.25  | CCC, ChT, MAPK, PTG, PJS, PEK                                                |
| Myc (Phospho-Thr58)            | 1.54  | CCC, ChT, MAPK, PTG, PJS, PEK                                                |
| NFkB-p100/p52 (Phospho-Ser865) | 2.09  | APO, PDGF, PNK                                                               |
| NFkB-p100/p52 (Phospho-Ser869) | 1.81  | APO, PNK                                                                     |
| NFkB-p105 (Phospho-Ser927)     | 1.22  | APO, PDGF, PTC, PNK                                                          |
| NFkB-p105/p50 (Phospho-Ser337) | 1.18  | APO, PDGF, PNK                                                               |
| NFkB-p105/p50 (Phospho-Ser907) | 1.34  | APO, PNK                                                                     |
| NFkB-p105/p50 (Phospho-Ser932) | 1.90  | APO, PDGF, PNK                                                               |
| NFkB-p65 (Phospho-Ser276)      | 1.25  | APO, PNK                                                                     |
| NFkB-p65 (Phospho-Ser529)      | 1.43  | APO, PNK                                                                     |
| NFkB-p65 (Phospho-Thr254)      | 1.12  | APO, PDGF, PNK                                                               |
| NMDAR2B (Phospho-Tyr1472)      | 2.07  | PST, PER                                                                     |
| p130Cas (Phospho-Tyr165)       | 1.18  | CYT, PST, PER                                                                |

(Continued)

| Phosphorylation Sites             | Ratio | * Signaling pathways                              |
|-----------------------------------|-------|---------------------------------------------------|
| p53 (Phospho-Ser15)               | 1.40  | AKT, APO, ChT, MAPK, PKB, AMPK, CCC, PFT, PER     |
| p53 (Phospho-Ser20)               | 1.53  | PKB, AMPK, CCC, PFT                               |
| p53 (Phospho-Ser315)              | 1.92  | AKT, APO, ChT, MAPK, PKB, AMPK, CCC, PFT          |
| p53 (Phospho-Ser33)               | 1.22  | AKT, APO, ChT, MAPK, PKB, AMPK, CCC, PFT          |
| p53 (Phospho-Ser378)              | 1.14  | PKB, AMPK, CCC, PFT                               |
| p53 (Phospho-Ser392)              | 1.18  | PKB, AMPK, APO, CCC, PFT, PER                     |
| p53 (Phospho-Ser9)                | 1.69  | AKT, APO, ChT, MAPK, PKB, AMPK, CCC, PFT          |
| P70S6K (Phospho-Ser418)           | 1.29  | PKB, AMPK, APO, PMT, PIR, PIG                     |
| P70S6K (Phospho-Thr229)           | 1.24  | PKB/AMPK/APO/PMT/PIR/PIG/PER                      |
| P70S6k (Phospho-Thr421)           | 1.81  | PKB, AMPK, APO, PMT, PIR, PIG                     |
| P70S6k-beta (Phospho-Ser423)      | 1.29  | PKB, APO, PMT, PIR, PER                           |
| P90RSK (Phospho-Thr573)           | 1.12  | APO, CCC, PMT, PDG                                |
| P95/NBS1 (Phospho-Ser343)         | 1.15  | CCC                                               |
| PAK1 (Phospho-Thr212)             | 1.24  | PDGF, EGF, PTG, PER, PEK                          |
| PAK1/2 (Phospho-Ser199)           | 1.29  | PDGF, EGF, PTG, PER, PEK                          |
| PAK1/2/3 (Phospho-Thr423/402/421) | 2.03  | PDGF, EGF, PTG, PEK                               |
| PAK2 (Phospho-Ser192)             | 1.20  | PDGF, PTG, PEK                                    |
| PDK1 (Phospho-Ser241)             | 1.65  | AKT, CYT, PKB, EGF, PMT, PIR, MET, PIG            |
| PECAM-1 (Phospho-Tyr713)          | 1.58  | PST                                               |
| PKACAT (Phospho-Thr197)           | 1.18  | AMPK, APO, CYT, CREB, PNK, PIR, PIG, PDG, PEK     |
| PKC delta (Phospho-Thr505)        | 1.14  | CREB, PVE, PTG, PIR, PDG, PGF, PFT, PEK           |
| PKC theta (Phospho-Thr538)        | 1.86  | CREB, PVE, PTG, PTC, PNK, PIR, PIG, PDG, PGF, PEK |
| PKC zeta (Phospho-Thr560)         | 1.47  | CREB, PVE, PTG, PNK, PIR, PIG, PDG, PGF, PEK      |
| PKD1/PKCmu(Phospho-Ser205)        | 1.90  | CREB, PDG                                         |
| PKD1/PKCmu(Phospho-Tyr463)        | 1.24  | CREB, PST/PDG                                     |
| PLC-beta (Phospho-Ser1105)        | 1.73  | AMPK, CYT, PDG, PEK                               |
| PLCG1 (Phospho-Tyr783)            | 1.11  | CREB, EGF, PST, PNK, PGF, PEK                     |
| PP2A-a (Phospho-Tyr307)           | 1.37  | PKB, CCC, PTG, PST, PMT, PIG, PEK, WNT, MET       |
| PPAR-r (Phospho-Ser112)           | 2.19  | PMT, MET                                          |
| PTEN (Phospho-Ser380)             | 1.19  | AKT, APO, MET, PKB, APO, PMT, PIG                 |
| Pyk2 (Phospho-Tyr402)             | 1.12  | AKT, CYT, MAPK, PST, PDG, PEK                     |

(Continued)

| Phosphorylation Sites                                        | Ratio | * Signaling pathways                                                         |
|--------------------------------------------------------------|-------|------------------------------------------------------------------------------|
| Pyk2 (Phospho-Tyr580)                                        | 1.19  | PST, PDG, PEK                                                                |
| Pyk2 (Phospho-Tyr881)                                        | 2.76  | PST, PDG, PEK                                                                |
| Rac1/cdc42 (Phospho-Ser71)                                   | 1.13  | AKT, PKB, CYT, MET, WNT                                                      |
| RAD52 (Phospho-Tyr104)                                       | 1.45  | CCC, PST                                                                     |
| Raf1 (Phospho-Ser259)                                        | 1.97  | AKT, APO, CYT, MAPK, CREB, PDGF, EGF, PVE, PTC, PJS, PIR, PGF, PFT, PER, PEK |
| Raf1 (Phospho-Ser338)                                        | 1.14  | AKT, APO, CYT, MAPK, CREB, PDGF, EGF, PVE, PTC, PJS, PIR, PGF, PFT, PER, PEK |
| Raf1 (Phospho-Ser621)                                        | 1.18  | CREB, PDGF, EGF, PVE, PTC, PJS, PIR, PGF, PFT, PER, PEK                      |
| Rb (Phospho-Ser780)                                          | 1.71  | CCC, PFT                                                                     |
| Rb (Phospho-Ser795)                                          | 1.25  | CCC, PFT                                                                     |
| Rb (Phospho-Ser807)                                          | 1.74  | CCC, PFT                                                                     |
| Rb (Phospho-Ser811)                                          | 1.21  | CCC, PFT                                                                     |
| Rho/Rac guanine nucleotide exchange factor2 (Phospho-Ser885) | 1.14  | CYT, PDGF, EGF, PTG, PMT, PJS, PEK                                           |
| RSK1/2/3/4 (Phospho-Ser221/227/218/232)                      | 1.16  | CREB, PMT, PEK                                                               |
| SAPK/JNK (Phospho-Thr183)                                    | 1.13  | MAPK, APO, PDGF, EGF, PTG, PNK, PJS, PGF                                     |
| SEK1/MKK4( Phospho-Ser80)                                    | 1.69  | MAPK, EGF, PTG, PGF                                                          |
| Shc (Phospho-Tyr427)                                         | 1.52  | CREB, PDGF, EGF, PVE, PTG, PST, PJS, PIR, PIG, PER                           |
| SHP-2 (Phospho-Tyr542)                                       | 1.20  | PST, PJS, PIG, MET, PGF, PER                                                 |
| SHP-2 (Phospho-Tyr580)                                       | 1.23  | PST, PJS, PIG, MET, PGF, PER                                                 |
| SLP-76 (Phospho-Tyr128)                                      | 1.24  | PTC, PST                                                                     |
| Smad1 (Phospho-Ser187)                                       | 1.14  | PTG                                                                          |
| Smad2 (Phospho-Ser467)                                       | 1.15  | PTG                                                                          |
| Smad2/3 (Phospho-Thr8)                                       | 1.14  | CCC, PTG                                                                     |
| Smad3 (Phospho-Ser204)                                       | 1.46  | CCC, PTG                                                                     |
| Smad3 (Phospho-Ser213)                                       | 1.14  | CCC, PTG                                                                     |
| Smad3 (Phospho-Ser425)                                       | 1.10  | CCC, PTG                                                                     |
| Smad3 (Phospho-Thr179)                                       | 1.68  | CCC, PTG                                                                     |
| SP1 (Phospho-Thr739)                                         | 1.41  | PTG                                                                          |
| Src (Phospho-Ser75)                                          | 1.38  | CYT, EGF, PVE, PJS, PDG, PER, PEK                                            |
| Src (Phospho-Tyr418)                                         | 1.38  | APO, CYT, MAPK, CYT, EGF, PVE, PST, PJS, PDG, PER, PEK                       |
| Src (Phospho-Tyr529)                                         | 1.11  | APO, CYT, MAPK, CYT, EGF, PVE, PST, PJS, PDG, PER, PEK                       |

(Continued)

| Phosphorylation Sites                        | Ratio | * Signaling pathways                    |
|----------------------------------------------|-------|-----------------------------------------|
| SRF (Phospho-Ser77)                          | 1.15  | CREB, PDGF, PIR, PEK                    |
| SRF (Phospho-Ser99)                          | 1.59  | CREB, PDGF, PIR, PEK                    |
| STAT1 (Phospho-Ser727)                       | 1.15  | APO, ChT, PDGF, EGF, PJS, PEK           |
| STAT1 (Phospho-Tyr701)                       | 1.51  | APO, ChT, PDGF, EGF, PST, PJS, PEK      |
| STAT3 (Phospho-Ser727)                       | 1.10  | APO, ChT, PDGF, EGF, PGF, PEK           |
| STAT3 (Phospho-Tyr705)                       | 1.35  | APO, ChT, PDGF, EGF, PST, PJS, PGF, PEK |
| STAT5A (Phospho-Ser780)                      | 1.33  | APO, ChT, PJS                           |
| STAT5A (Phospho-Tyr694)                      | 1.57  | APO, ChT, PST, PJS                      |
| STAT6 (Phospho-Thr645)                       | 1.97  | APO, ChT, PJS                           |
| STAT6 (Phospho-Tyr641)                       | 1.23  | APO, ChT, PST, PJS                      |
| SYK (Phospho-Tyr348)                         | 1.56  | PKB, PST, PNK, PER                      |
| SYK (Phospho-Tyr525)                         | 1.69  | PKB, PST, PNK, PER                      |
| Synapsin (Phospho-Ser9)                      | 1.62  | CYT                                     |
| Synucleinalpha (Phospho-Tyr125)              | 1.21  | PST                                     |
| TAK1 (Phospho-Thr184)                        | 1.15  | APO, PTG, PNK, PDG, WNT                 |
| Tau (Phospho-Ser214)                         | 1.48  | MAPK                                    |
| Tau (Phospho-Ser356)                         | 1.12  | MAPK                                    |
| Tau (Phospho-Ser396)                         | 1.24  | MAPK                                    |
| Tau (Phospho-Ser422)                         | 1.11  | MAPK                                    |
| Tau (Phospho-Thr181)                         | 1.22  | MAPK                                    |
| Tau (Phospho-Thr205)                         | 1.95  | MAPK                                    |
| TOP2A/DNA topoisomerase II (Phospho-Ser1106) | 1.12  | CCC                                     |
| Tuberin, TSC2 (Phospho-Thr1462)              | 1.18  | PKB, AMPK, PMT, PIG                     |
| Tuberin/TSC2 (Phospho-Ser939)                | 1.12  | PKB, AMPK, PMT, PIG                     |
| TyrosineHydroxylase (TH) (Phospho-Ser8)      | 1.14  | PDG                                     |
| VASP (Phospho-Ser157)                        | 1.41  | CYT                                     |
| VEGFR2 (Phospho-Tyr1214)                     | 1.40  | NMR, PVE, PST                           |
| VEGFR2 (Phospho-Tyr951)                      | 1.37  | NMR, PVE, PST                           |
| WAVE1 (Phospho-Tyr125)                       | 1.15  | CYT, PST                                |
| XIAP (Phospho-Ser87)                         | 1.28  | PKB, APO, PER                           |
| Zap-70 (Phospho-Tyr319)                      | 1.14  | AKT, PTC, PST, PNK                      |

\*AKT: AKT; APO: Apoptosis; CCC: Cell Cycle Control; CHR: Chromatin Transcription; CYT: Cytoskeletal; MAP: MAPK; MET: Metabolism; NUC: Nuclear Membrane Receptor; PAB: AKT/PKB Signaling; PAM: AMPK; PCR: cAMP-response element binding protein; PDG: PDGF; PEG: EGF; PEK: ERK; PER: ErbB/Her Signaling pathway; PFT: p53 Signaling pathway; PGF: FGF; PGP: G protein coupled receptors; PIG: Insulin Receptor; PIR: IGF-1R; PJS: JAK/STAT Signaling pathway; PMT: mTOR; PNK: NF- $\kappa$ B; PST: Tyrosine; PTC: T-Cell Receptor; PTG: TGF-beta; PVE: VEGF; WNT: WNT Signaling pathway



**Supplementary Table S2: The baseline clinical and pathological characteristics of the 203 patients**

| Parameter                       | No. of Patients ( <i>n</i> = 203) |                                   |                   |
|---------------------------------|-----------------------------------|-----------------------------------|-------------------|
|                                 | MSP positive<br>( <i>n</i> = 100) | MSP negative<br>( <i>n</i> = 103) | <i>P</i> value    |
| <b>Age (yr)</b>                 |                                   |                                   |                   |
| Mean                            | 68.25                             | 71.53                             | <i>P</i> = 0.9517 |
| Median                          | 70                                | 70                                |                   |
| Range                           | 51–84                             | 50–85                             |                   |
| <b>Preoperative PSA (ng/mL)</b> |                                   |                                   |                   |
| Median                          | 67.03                             | 16.66                             | <i>P</i> < 0.0001 |
| Range                           | 4.07–190.50                       | 4.10–52                           |                   |
| <b>Clinical stage</b>           |                                   |                                   |                   |
| T1c                             | 2                                 | 54                                | <i>P</i> < 0.0001 |
| T2a                             | 10                                | 37                                |                   |
| T2b                             | 47                                | 10                                |                   |
| T2c                             | 41                                | 2                                 |                   |
| <b>Biopsy Gleason score</b>     |                                   |                                   |                   |
| < 7                             | 34                                | 69                                | <i>P</i> < 0.0001 |
| = 7                             | 15                                | 26                                |                   |
| > 7                             | 51                                | 8                                 |                   |
| <b>Pathologic stage</b>         |                                   |                                   |                   |
| pT2                             | 57                                | 69                                | <i>P</i> = 0.1779 |
| pT3a                            | 23                                | 20                                |                   |
| pT3b                            | 14                                | 13                                |                   |
| pT4                             | 6                                 | 1                                 |                   |
| <b>Gleason score</b>            |                                   |                                   |                   |
| < 7                             | 21                                | 77                                | <i>P</i> < 0.0001 |
| =7                              | 19                                | 18                                |                   |
| > 7                             | 60                                | 8                                 |                   |
| <b>Surgical margin</b>          |                                   |                                   |                   |
| Positive                        | 29                                | 3                                 | <i>P</i> < 0.0001 |
| Negative                        | 71                                | 100                               |                   |
| <b>Lymph-node status</b>        |                                   |                                   |                   |
| Positive                        | 56                                | 1                                 | <i>P</i> < 0.0001 |
| Negative                        | 44                                | 102                               |                   |

**Supplementary Table S3: Univariate and multivariate models for predicting subsequent biochemical recurrence**

| Variables                                       | Univariate       |          | Multivariate     |          |
|-------------------------------------------------|------------------|----------|------------------|----------|
|                                                 | HR (95% CI)      | <i>P</i> | HR (95% CI)      | <i>P</i> |
| PSA (ng/ml): < 10, 10-20, > 20                  | 1.09 (0.72–1.29) | 0.319    | -                | -        |
| Gleason score: < 7, = 7, > 7                    | 2.26 (1.52–3.23) | 0.005    | 1.95 (1.54–2.21) | 0.011    |
| T stage: T2, T3a, T3b, T4                       | 2.79 (2.04–3.41) | 0.016    | 2.54 (1.90–3.23) | 0.027    |
| Surgical margin status:<br>negative, positive   | 3.67 (2.62–4.67) | < 0.001  | 3.26 (2.52–4.22) | < 0.001  |
| Lymph node status:<br>negative, positive        | 3.01 (2.49–3.67) | < 0.001  | 2.83 (1.99–3.53) | 0.011    |
| CRMP4 methylation status:<br>negative, positive | 7.23 (5.34–9.71) | < 0.001  | 6.35 (4.64–8.95) | < 0.001  |
